# Supplementary material for: Biocompatibility and biodegradability of polyacrylate/ZnO nanocomposite during the activated sludge treatment process
Source: PubMed Central journal article supplement (PMC6211664; doi:10.1371/journal.pone.0205990), 2018-11-01
Supplement: pone.0205990.s002.pdf [file pone.0205990.s002.pdf]

**S2 Table. Jaccard similarity matrix of bacterial communities in all samples.**

|                 | control<br>0d | control<br>5d | control<br>20d | reference<br>5d | reference<br>5d | LJL-<br>2H 5d | LJL-<br>2H<br>20d | LJL-<br>3H 5d | LJL-<br>3H<br>20d |
|-----------------|---------------|---------------|----------------|-----------------|-----------------|---------------|-------------------|---------------|-------------------|
| control<br>0d   | 1             | 0.697         | 0.6667         | 0.4444          | 0.5714          | 0.5676        | 0.6286            | 0.5278        | 0.6176            |
| control<br>5d   | <b>0.6970</b> | 1             | 0.8929         | 0.5625          | 0.4324          | 0.697         | 0.6667            | 0.6563        | 0.6563            |
| control<br>20d  | <b>0.6667</b> | <b>0.8929</b> | 1              | 0.5806          | 0.4857          | <b>0.7742</b> | 0.6875            | 0.7333        | 0.7333            |
| reference<br>5d | 0.4444        | 0.5625        | 0.5806         | 1               | 0.5806          | 0.5758        | 0.5               | 0.5313        | 0.4848            |
| reference<br>5d | 0.5714        | 0.4324        | 0.4857         | 0.5806          | 1               | 0.5714        | 0.5882            | 0.5294        | 0.5294            |
| LJL-2H<br>5d    | 0.5676        | <b>0.6970</b> | 0.7742         | 0.5758          | 0.5714          | 1             | 0.8387            | 0.8966        | 0.8333            |
| LJL-2H<br>20d   | 0.6286        | <b>0.6667</b> | 0.6875         | 0.5             | 0.5882          | <b>0.8387</b> | 1                 | 0.8621        | 0.8               |
| LJL-3H<br>5d    | 0.5278        | 0.6563        | 0.7333         | 0.5313          | 0.5294          | <b>0.8966</b> | <b>0.8621</b>     | 1             | 0.7333            |
| LJL-3H<br>20d   | 0.6176        | 0.6563        | 0.7333         | 0.4848          | 0.5294          | <b>0.8333</b> | 0.8               | 0.7333        | 1                 |
