# Supplementary material for: Biocompatibility and biodegradability of polyacrylate/ZnO nanocomposite during the activated sludge treatment process
Source: PubMed Central journal article supplement (PMC6211664; doi:10.1371/journal.pone.0205990), 2018-11-01
Supplement: pone.0205990.s006.pdf [file pone.0205990.s006.pdf]

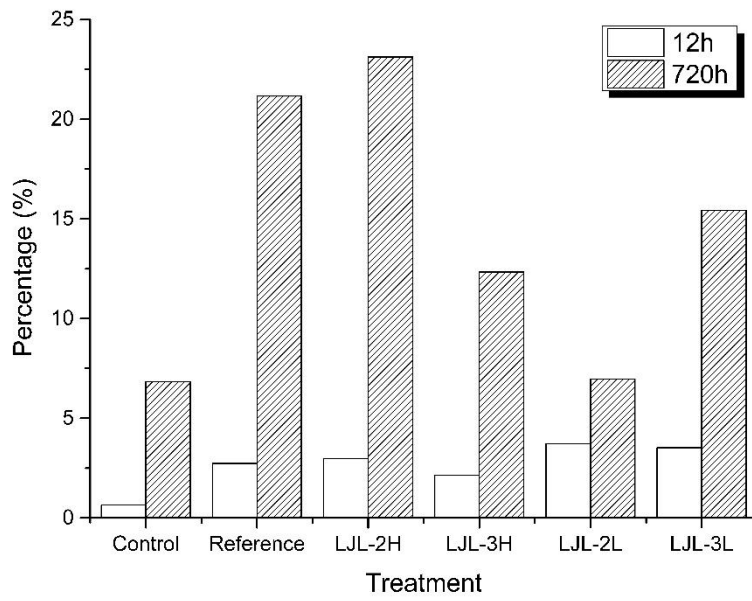

**S1 Fig. Comparisons of proportions of dehydrogenase to protein in activated sludge incubations on both 12th and 720th hour.** The proportion was calculated by the averages of dehydrogenase and corresponding protein concentration.
