# Supplementary material for: Biocompatibility and biodegradability of polyacrylate/ZnO nanocomposite during the activated sludge treatment process
Source: PubMed Central journal article supplement (PMC6211664; doi:10.1371/journal.pone.0205990), 2018-11-01
Supplement: pone.0205990.s007.pdf [file pone.0205990.s007.pdf]

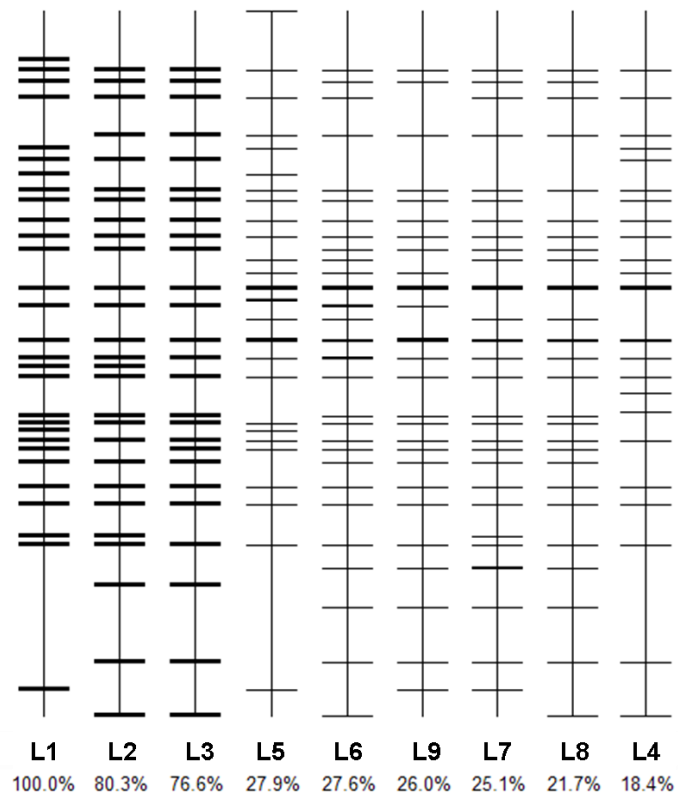

**S2 Fig. DGGE fingerprint sketch to order the samples according to their similarities comparing with L1 which represents the bacterial community of original activated sludge.**
